# Supplementary material for: Cosmetic colouring by Bearded Vultures Gypaetus barbatus: still no evidence for an antibacterial function
Source: PeerJ. 2019 May 15;7:e6783. doi: 10.7717/peerj.6783 (PMC6525594; doi:10.7717/peerj.6783)
Supplement: Dataset S2 [file peerj-07-6783-s002.xlsx]

## Sheet: 20 min
		2018-08-13	2018-08-13				2018-08-13	2018-08-13					2018-08-28	2018-08-28				2018-08-28	2018-08-28					2018-09-03	2018-09-03				2018-09-03	2018-09-03
		20 min	20 min	-5			20 min	20 min	-6				20 min	20 min	-5			20 min	20 min	-6				20 min	20 min	-5			20 min	20 min	-6
		Replikat 1	Replikat 2	MW	CFU/ML -5		Replikat 1	Replikat 2	MW	CFU/ML -6			Replikat 1	Replikat 2	MW	CFU/ML -5		Replikat 1	Replikat 2	MW	CFU/ML -6			Replikat 1	Replikat 2	MW	CFU/ML -5		Replikat 1	Replikat 2	MW	CFU/ML -6
1A	Kars + Sample + Light	ND	ND	ND	ND		9	15	12	120000			14	46	30	30000		4	11	7.5	75000		1A	42	70	56	56000		10	8	9	90000	Kars + Sample + Light
2	Kars + Light \Sample	ND	ND	ND	ND		8	12	10	100000			32	45	38.5	38500		3	6	4.5	45000		2	29	82	55.5	55500		13	10	11.5	115000	Kars + Light \Sample
3A	Kars + Sample + Dark	ND	ND	ND	ND		5	12	8.5	85000			19	40	29.5	29500		3	2	2.5	25000		3A	45	63	54	54000		4	11	7.5	75000	Kars + Sample + Dark
4	Kars + Dark \Sample	ND	ND	ND	ND		12	2	7	70000			32	21	26.5	26500		1	8	4.5	45000		4	40	44	42	42000		10	11	10.5	105000	Kars + Dark \Sample
14	Kars + Ampicillin	ND	ND	ND	ND		0	1	0.5	5000			0	0	0	0		0	2	1	10000		14	0	0	0	0		0	0	0	0	Kars + Ampicillin
																														0
1C	Kars + Sample + Light	ND	ND	ND	ND		5	9	7	70000			34	14	24	24000		6	5	5.5	55000		1C	30	51	40.5	40500		5	8	6.5	65000	Kars + Sample + Light
3C	Kars + Sample + Dark	ND	ND	ND	ND		8	3	5.5	55000			41	32	36.5	36500		7	2	4.5	45000		3C	60	76	68	68000		8	10	9	90000	Kars + Sample + Dark
5A	XL1 + Sample + Light	ND	ND	ND	ND		30	47	38.5	385000					#DIV/0!	#DIV/0!		23	20	21.5	215000		5A	?	238	238	238000		43	52	47.5	475000	XL1 + Sample + Light
6	XL1 + Light \Sample	ND	ND	ND	ND		23	29	26	260000					#DIV/0!	#DIV/0!		26	42	34	340000		6	206	179	192.5	192500		40	43	41.5	415000	XL1 + Light \Sample
7A	XL1 + Sample + Dark	ND	ND	ND	ND		30	28	29	290000					#DIV/0!	#DIV/0!		21	24	22.5	225000		7A	210	153	181.5	181500		37	36	36.5	365000	XL1 + Sample + Dark
8	XL1 + Dark \Sample	ND	ND	ND	ND		42	44	43	430000					#DIV/0!	#DIV/0!		25	31	28	280000		8	208	123	165.5	165500		37	48	42.5	425000	XL1 + Dark \Sample
15	XL1 + Ampicillin	ND	ND	ND	ND		25	23	24	240000					#DIV/0!	#DIV/0!		33	27	30	300000		15	0	0	0	0		0	0	0	0	XL1 + Ampicillin
5C	XL + Sample + Light	ND	ND	ND	ND		48	55	51.5	515000					#DIV/0!	#DIV/0!		35	36	35.5	355000		5C	179	199	189	189000		35	58	46.5	465000	XL + Sample + Light
7C	XL + Sample + Dark	ND	ND	ND	ND		30	36	33	330000					#DIV/0!	#DIV/0!		25	30	27.5	275000		7C	210	205	207.5	207500		36	38	37	370000	XL + Sample + Dark
9A	Blich + Sample + Light	99	83	91	91000		12	15	13.5	135000			115	95	105	105000		10	10	10	100000		9A	147	122	134.5	134500		29	34	11	110000	Blich + Sample + Light
10	Blich + Light \Sample	80	92	86	86000		12	9	10.5	105000			50	49	49.5	49500		7	9	8	80000		10	99	105	102	102000		44	34	13	130000	Blich + Light \Sample
11A	Blich + Sample + Dark	110	111	110.5	110500		16	8	12	120000			81	80	80.5	80500		10	8	9	90000		11A	135	125	130	130000		28	28	9	90000	Blich + Sample + Dark
12	Blich + Dark \Sample	59	46	52.5	52500		16	9	12.5	125000			44	41	42.5	42500		6	12	9	90000		12	97	102	99.5	99500		46	31	13	130000	Blich + Dark \Sample
16	Blich + Ampicillin	66	72	69	69000		0	9	4.5	45000			23	14	18.5	18500		5	4	4.5	45000		16	0	0	0	0		0	0	0	0	Blich + Ampicillin
9C	Blich + Sample + Light	61	80	70.5	70500		12	10	11	110000			45	88	66.5	66500		13	13	13	130000		9C	97	140	118.5	118500		33	35	11	110000	Blich + Sample + Light
11C	Blich + Sample + Dark	59	69	64	64000		13	7	10	100000			73	97	85	85000		10	8	9	90000		11C	101	143	122	122000		27	28	9	90000	Blich + Sample + Dark
13A	Sample \bacteria (light)	0	0	0	0		0	0	0	0			0	0	0	0		0	0	0	0		13A	0	0	0	0		0	0	0	0	Sample \bacteria (light)
13C	Sample \bacteria (light)	0	0	0	0		0	0	0	0			0	0	0	0		0	0	0	0		13C	0	0	0	0		0	0	0	0	Sample \bacteria (light)

## Sheet: 18 h
		2018-08-13	2018-08-13				2018-08-13	2018-08-13					2018-08-28	2018-08-28				2018-08-28	2018-08-28				2018-09-03	2018-09-03				2018-09-03	2018-09-03
		18 h	18 h	-5			18 h	18 h	-6				18 h	18 h	-5			18 h	18 h	-6			18 h	18 h	-5			18 h	18 h	-6
		Replikat 1	Replikat 2	MW	CFU/ML -5		Replikat 1	Replikat 2	MW	CFU/ML -6			Replikat 1	Replikat 2	MW	CFU/ML -5		Replikat 1	Replikat 2	MW	CFU/ML -6		Replikat 1	Replikat 2	MW	CFU/ML -5		Replikat 1	Replikat 2	MW	CFU/ML -6
1A	Kars + Sample + Light	ND	ND	ND	ND		12	37	24.5	245000000			9	15	12	1200000000		7	1	4	40000000		91	132	111.5	1115000000		36	50	43	4300000000
2	Kars + Light \Sample	ND	ND	ND	ND		15	25	20	200000000			23	23	23	2300000000		confl	30	30	300000000		35	35	35	350000000		5	9	7	700000000
3A	Kars + Sample + Dark	ND	ND	ND	ND		5	13	9	90000000			18	21	19.5	1950000000		7	1	4	40000000		35	46	40.5	405000000		13	14	13.5	1350000000
4	Kars + Dark \Sample	ND	ND	ND	ND		7	19	13	130000000			9	9	9	900000000		1	0	0.5	5000000		22	33	27.5	275000000		3	14	8.5	850000000
14	Kars + Ampicillin	ND	ND	ND	ND		0	0	0	0			0	0	0	0		0	0	0	0		0	0	0	0		0	0	0	0
1C	Kars + Sample + Light	ND	ND	ND	ND		6	12	9	90000000			17	7	12	1200000000		5	3	4	40000000		27	109	68	680000000		6	68	37	3700000000
3C	Kars + Sample + Dark	ND	ND	ND	ND		9	6	7.5	75000000			13	10	11.5	1150000000		5	1	3	30000000		16	62	39	390000000		21	36	28.5	2850000000
5A	XL1 + Sample + Light	ND	ND	ND	ND		189	166	177.5	1775000000			153	152	152.5	15250000000		not counted	not counted	#DIV/0!	#DIV/0!		49	190	119.5	1195000000		156	212	184	18400000000
6	XL1 + Light \Sample	ND	ND	ND	ND		99	87	93	930000000			94	96	95	9500000000		not counted	not counted	#DIV/0!	#DIV/0!		141	201	171	1710000000		122	106	114	11400000000
7A	XL1 + Sample + Dark	ND	ND	ND	ND		132	128	130	1300000000			163	146	154.5	15450000000		not counted	not counted	#DIV/0!	#DIV/0!		144	164	154	1540000000		120	102	111	11100000000
8	XL1 + Dark \Sample	ND	ND	ND	ND		92	151	121.5	1215000000			192	200	196	19600000000		not counted	not counted	#DIV/0!	#DIV/0!		187	95	141	1410000000		140	62	101	10100000000
15	XL1 + Ampicillin	ND	ND	ND	ND		0	0	0	0			0	0	0	0		not counted	not counted	#DIV/0!	#DIV/0!		0	0	0	0		0	0	0	0
5C	XL + Sample + Light	ND	ND	ND	ND		159	201	180	1800000000			24	32	28	2800000000		not counted	not counted	#DIV/0!	#DIV/0!		212	212	212	2120000000		186	134	160	16000000000
7C	XL + Sample + Dark	ND	ND	ND	ND		99	108	103.5	1035000000			106	159	132.5	13250000000		not counted	not counted	#DIV/0!	#DIV/0!		272	159	215.5	2155000000		119	145	132	13200000000
9A	Blich + Sample + Light	ND	ND	ND	ND			76	76	760000000			conf	conf	#DIV/0!	#DIV/0!		69	72	70.5	705000000		142	151	146.5	1465000000		32	46	39	3900000000
10	Blich + Light \Sample	ND	ND	ND	ND		3	3	3	30000000			40	43	41.5	4150000000		18	10	14	140000000		84	88	86	860000000		16	19	17.5	1750000000
11A	Blich + Sample + Dark	ND	ND	ND	ND		25	17	21	210000000			conf	conf	#DIV/0!	#DIV/0!		50	33	41.5	415000000		125	101	113	1130000000		44	54	49	4900000000
12	Blich + Dark \Sample	ND	ND	ND	ND		11	8	9.5	95000000			conf	61	61	6100000000		29	22	25.5	255000000		69	66	67.5	675000000		21	20	20.5	2050000000
16	Blich + Ampicillin	ND	ND	ND	ND		0	0	0	0			0	0	0	0		0	0	0	0		0	0	0	0		0	0	0	0
9C	Blich + Sample + Light	ND	ND	ND	ND		108	29	68.5	685000000			conf	conf	#DIV/0!	#DIV/0!		80	43	61.5	615000000		88	80	84	840000000		35	48	41.5	4150000000
11C	Blich + Sample + Dark	ND	ND	ND	ND		33	33	33	330000000			conf	conf	#DIV/0!	#DIV/0!		57	46	51.5	515000000		91	102	96.5	965000000		19	33	26	2600000000
																							0	0	0	0		0	0	0	0
13A	Sample \bacteria (light)		0	0	0		0	0	0	0			0	0	0	0		0	0	0	0		0	0	0	0		0	0	0	0
13C	Sample \bacteria (light)		0	0	0		0	0	0	0			0	0	0	0		0	0	0	0
ND: not done
